# Supplementary material
Source: PubMed Central journal article supplement (PMC7550475)
Supplement: 10815_2020_1935_MOESM1_ESM.pdf [file 10815_2020_1935_MOESM1_ESM.pdf]

## **Supplementary material – Media composition**

### **Universal IVF Medium - Origio, Malov, Denmark, ref. #10310060A**

Use in clinical practice reported by Rosendahl et al. [1]

| <b>Components</b>                   | <b>CAS#</b> | <b>Approx. %</b> |
|-------------------------------------|-------------|------------------|
| Calcium Chloride                    | 10043-52-4  | <0.1             |
| Gentamicin Sulphate                 | 1405-41-0   | <0.01            |
| Glucose                             | 50-99-7     | <0.1             |
| Human Serum Albumin                 |             | <1               |
| Magnesium Sulphate                  | 7487-88-9   | <0.1             |
| Phenol Red (1031 only)              | 34487-61-1  | <0.01            |
| Potassium Chloride                  | 7447-40-7   | <0.1             |
| Sodium Bicarbonate                  | 144-55-8    | <1               |
| Sodium Chloride                     | 7647-14-5   | <1               |
| Sodium Phosphate monobasic          | 10049-21-5  | <0.1             |
| Sodium Pyruvate                     | 113-24-6    | <0.1             |
| SSR® (Synthetic Serum Replacement)* |             | <0.01            |
| Water                               |             | >90              |

\* Contains Human Insulin recombinant.

### **Leibovitz's L-15 Medium + GlutaMAX™ - Gibco, Bleiswijk, Netherlands, ref. #31415-029**

Use in clinical practice reported by Isachenko et al. [2]

| <b>Components</b>    | <b>Molecular Weight</b> | <b>mM</b>  |
|----------------------|-------------------------|------------|
| Glycine              | 75.0                    | 2.6666667  |
| L-Alanine            | 89.0                    | 2.52809    |
| L-Alanyl-L-Glutamine | 217.0                   | 2.0552995  |
| L-Arginine           | 174.0                   | 2.8735633  |
| L-Asparagine         | 132.0                   | 1.8939394  |
| L-Cysteine           | 121.0                   | 0.9917355  |
| L-Histidine          | 155.0                   | 1.6129032  |
| L-Isoleucine         | 131.0                   | 1.908397   |
| L-Leucine            | 131.0                   | 0.9541985  |
| L-Lysine             | 146.0                   | 0.51369864 |
| L-Methionine         | 149.0                   | 0.5033557  |
| L-Phenylalanine      | 165.0                   | 0.75757575 |
| L-Serine             | 105.0                   | 1.9047619  |
| L-Threonine          | 119.0                   | 2.5210085  |
| L-Tryptophan         | 204.0                   | 0.09803922 |
| L-Tyrosine           | 181.0                   | 1.6574585  |

|                                                                        |       |              |
|------------------------------------------------------------------------|-------|--------------|
| L-Valine                                                               | 117.0 | 0.85470086   |
| Choline chloride                                                       | 140.0 | 0.007142857  |
| D-Calcium pantothenate                                                 | 477.0 | 0.002096436  |
| Folic Acid                                                             | 441.0 | 0.0022675737 |
| Niacinamide                                                            | 122.0 | 0.008196721  |
| Pyridoxine hydrochloride                                               | 206.0 | 0.004854369  |
| Riboflavin 5'-phosphate Na                                             | 478.0 | 2.0920503E-4 |
| Thiamine monophosphate                                                 | 442.0 | 0.0022624435 |
| i-Inositol                                                             | 180.0 | 0.011111111  |
| Calcium Chloride (CaCl <sub>2</sub> ) (anhyd.)                         | 111.0 | 1.2612612    |
| Magnesium Chloride (anhydrous)                                         | 95.0  | 0.9863158    |
| Magnesium Sulfate (MgSO <sub>4</sub> ) (anhyd.)                        | 120.0 | 0.8139166    |
| Potassium Chloride (KCl)                                               | 75.0  | 5.3333335    |
| Potassium Phosphate monobasic (KH <sub>2</sub> PO <sub>4</sub> )       | 136.0 | 0.44117647   |
| Sodium Chloride (NaCl)                                                 | 58.0  | 137.93103    |
| Sodium Phosphate dibasic (Na <sub>2</sub> HPO <sub>4</sub> ) anhydrous | 142.0 | 1.3380282    |
| D+ Galactose                                                           | 180.0 | 5.0          |
| Phenol Red                                                             | 376.4 | 0.026567481  |
| Sodium Pyruvate                                                        | 110.0 | 5.0          |

## References

1. Rosendahl M, Schmidt KT, Ernst E, Rasmussen PE, Loft A, Byskov AG et al. Cryopreservation of ovarian tissue for a decade in Denmark: a view of the technique. *Reproductive BioMedicine Online*. 2011;22(2):162-71. doi:<https://doi.org/10.1016/j.rbmo.2010.10.015>.
2. Isachenko V, Dittrich R, Keck G, Isachenko E, Rahimi G, van der Ven H et al. Cryopreservation of Ovarian Tissue: Detailed Description of Methods for Transport, Freezing and Thawing. *Geburtshilfe und Frauenheilkunde*. 2012;72(10):927-32. doi:<http://doi.org/10.1055/s-0032-1327812>.
